# Supplementary material for: Downstream promoter interactions of TFIID TAFs facilitate transcription reinitiation
Source: PubMed Central journal article supplement — Genes Dev. 2017 Nov 1;31(21):2162–74. doi: 10.1101/gad.306324.117 (PMC5749164; doi:10.1101/gad.306324.117), 2017-11-01
Supplement: supp_gad.306324.117_Supplemental_Information.pdf [file supp_gad.306324.117_Supplemental_Information.pdf]

**Supplemental Information for Joo et al.**

Supplemental Figures S1-S7

Supplemental References

Supplemental Tables S1-S4

## Figure S1, related to Figure 1.

(A) Volcano plot of statistical significance (y-axis,  $\log_{10}$  of p-value) versus fold enrichment (x-axis,  $\log_2$  of +NTP/-NTP ratio) for proteins associated with the downstream region of the transcription template as illustrated in **Fig 1A**. Data represents three biological replicates each done with two technical replicates of quantitative mass spectrometry analyses, all using naked DNA templates. Each circle represents an individual protein, quantitated as the sum of all identified peptides. Values on x-axis are the average of values from all six experiments. P-value is by t-test of specific protein values against total identified proteins (712 total proteins identified in all six repeats).

(B-C) Plots of change in downstream protein levels (x-axis,  $\log_2$ ) upon NTP (B) or  $\alpha$ -amanitin (C) treatment versus the probability of being outside the normal distribution as calculated by the Mixed Model function (normalmixEM) in the R statistic package. Lines are drawn at 0.95 confidence level.

(D) Scatter plot comparing NTP-dependent protein binding to downstream DNA (y-axis,  $\log_2$  of +NTP /- NTP ratio from SspI elution) to that of the entire core-promoter and downstream DNA (x-axis,  $\log_2$  of + NTP /- NTP ratio by PstI elution) on naked DNA templates. The decrease in total RNAPII (PstI elution) contrasts with the increase downstream (SspI elution), indicating that not all upstream RNAPII proceeds to elongation or that RNAPII in ECs is less stably bound than that in PICs.

(E) Scatter plot comparing NTP-dependent protein binding to downstream DNA (SspI elution) on chromatin templates (y-axis) versus naked templates (x-axis).

# Figure S1

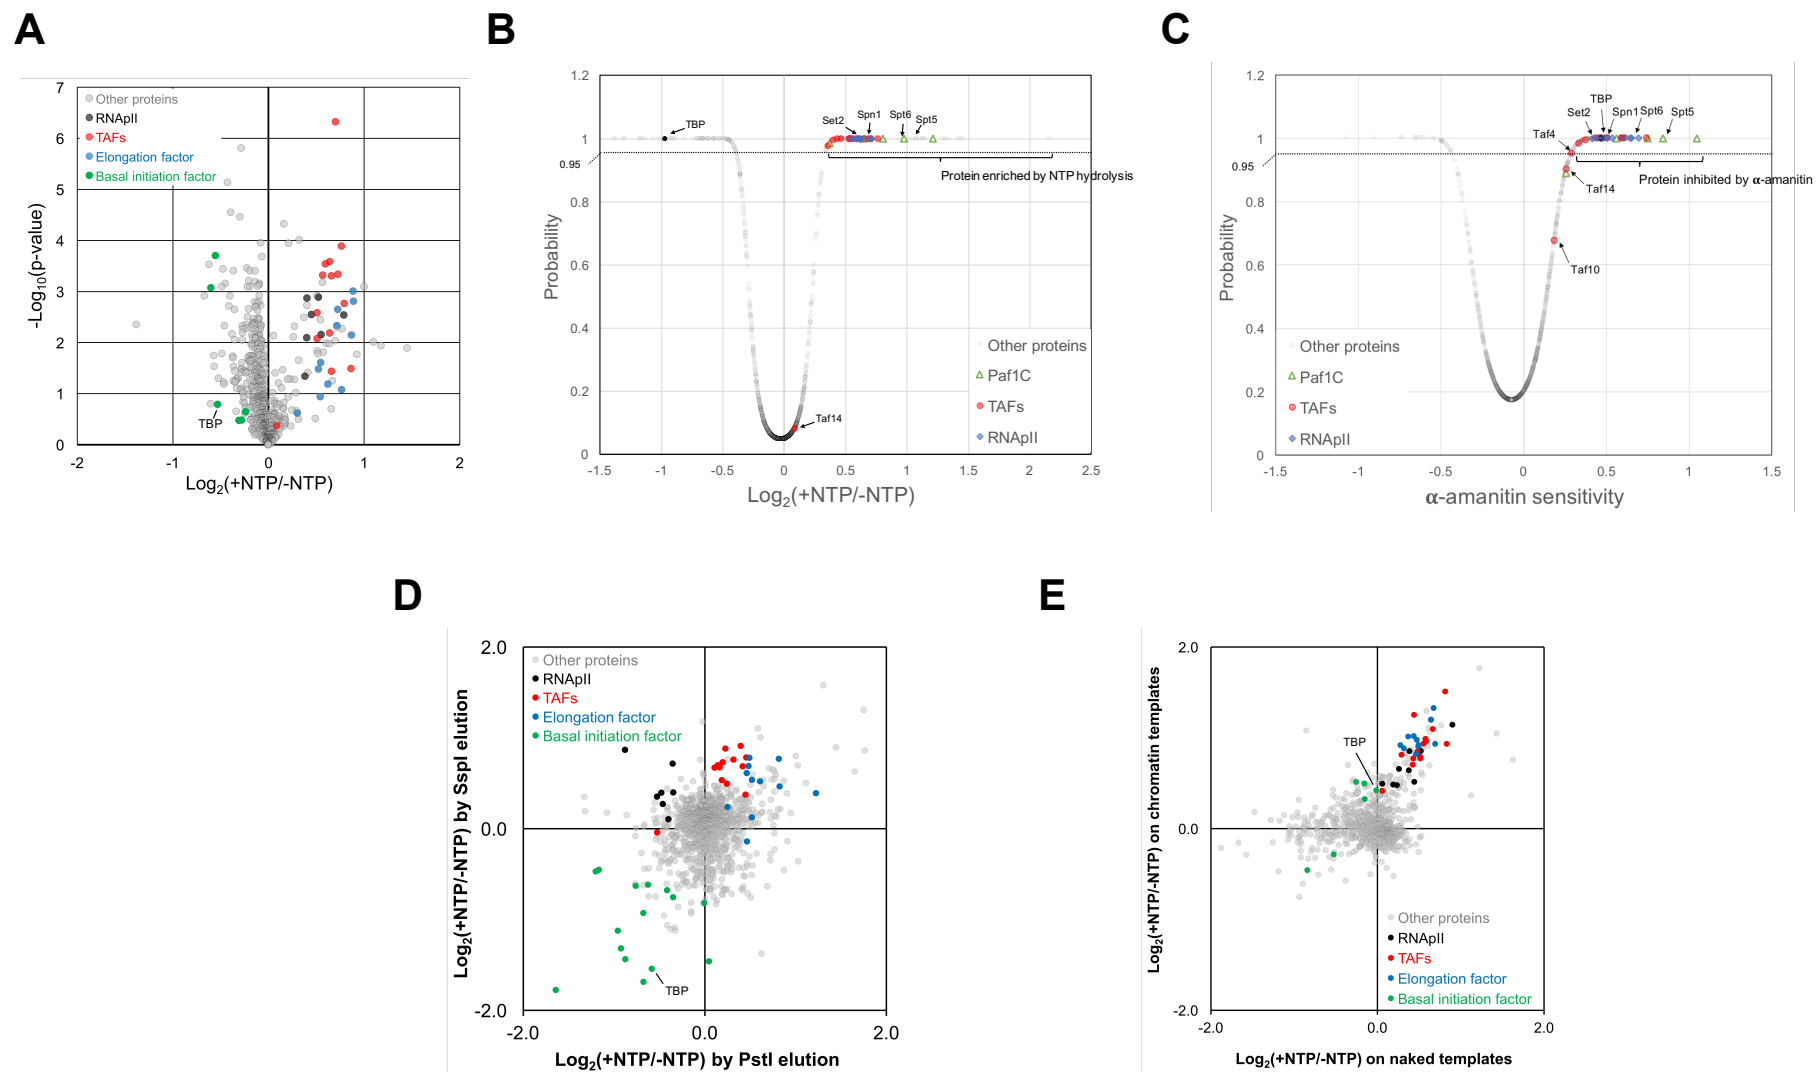

## Figure S2, related to Figure 1.

(A) TBP and Taf1 binding on different promoter templates before (-NTP) and after (+NTP) incubation with all four NTPs. Upper panel shows schematic of template series. All templates were 5' biotinylated and immobilized on beads, incubated with nuclear extract, and then purified before or after NTP treatment. The lower panels show immunoblots of total bound proteins eluted by boiling. Ratios of factors +/-NTPs is shown between pairs of lanes. All templates contain RNAPII promoters except RDN1-1, which is the rDNA promoter template transcribed by RNAPI. CYC1p was amplified by PCR from SB649 with primers (O#3151/1477). PGK1 was amplified by PCR from SB1718 with primers (O#3151/3433). HIS4p was amplified by PCR from F529 with primers (O#1105/1104). HIS4 was amplified by PCR from SB1722 with primers (O#1105/3513). RDN1-1 was amplified by PCR from F82 with primers (O#3278/3279).

(B) Comparison of ATP versus NTPs. Immobilized templates used in **Fig 1C** were incubated with nuclear extract, treated without NTPs, with ATP alone, or with three NTPs (A, C, and UTP) plus 3'O-meGTP. Bound proteins were eluted with Ssp I and immunoblotted for Taf1 and TBP.

(C) The promoter is required for downstream TAF recruitment. TBP and Taf1 binding was assayed on different length N-terminal deletion templates before or after incubation with A, C, and UTP plus 3'O-meGTP. Upper panel shows schematic of template series. The lower panels show templates stained with ethidium bromide and immunoblots of proteins eluted by Ssp I.

# Figure S2

**A**

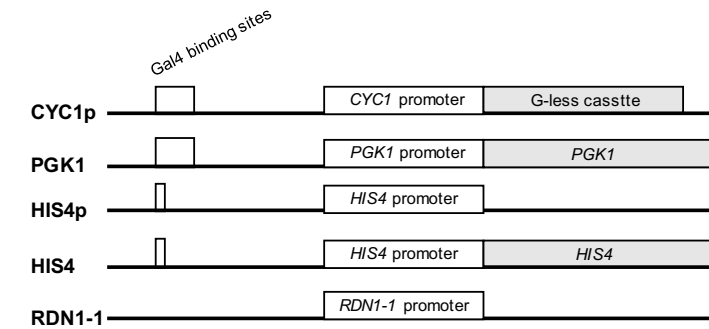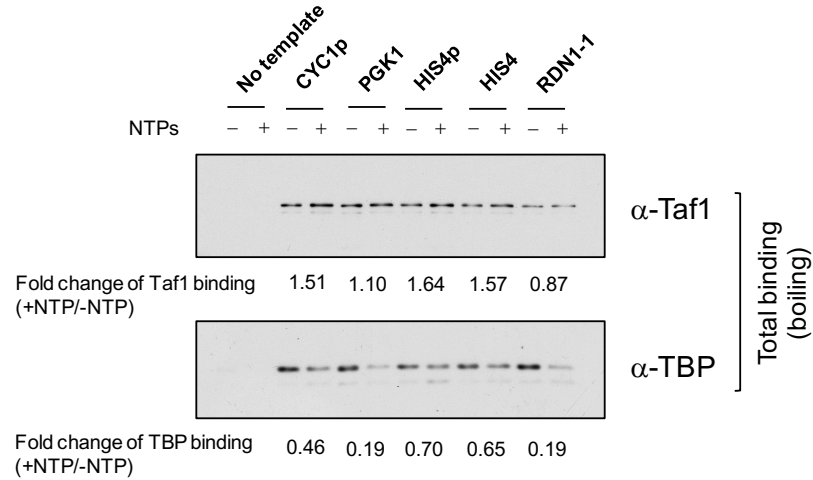

**B**

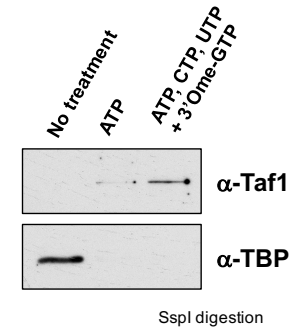

**C**

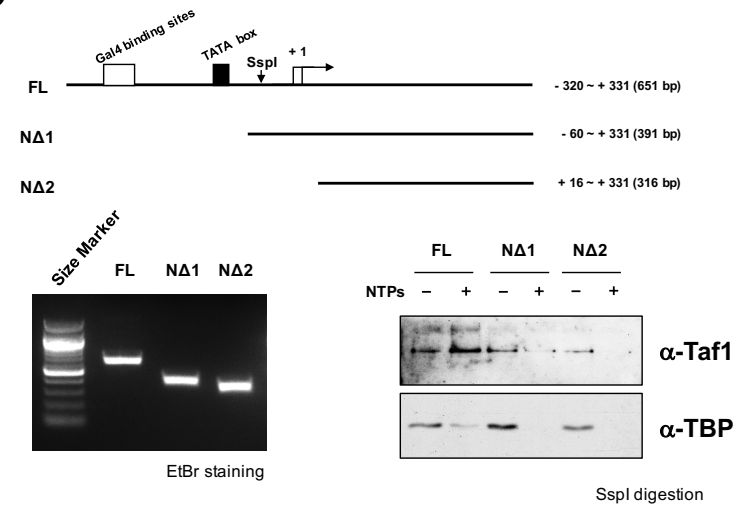

### Figure S3, related to Figure 2.

(A) Comparison of gene expression changes in two different *taf1-ts* strains (YJS8 and YKH108) from microarray data in (Huisinga and Pugh, 2004). The correlation coefficient between the two *taf1* alleles is 0.89. Dots represent individual genes, color-coded for TAF-dependence as in **Fig 2**. Group High: 825 genes (Fold changes more than one standard deviation ( $SD = 0.57$ ) below the mean of ratios). Group Medium: 4327 genes (Fold changes between -1 SD and +1 SD from mean of ratios). Group Low: 729 genes (Fold changes more than one SD above the mean of ratios). Group RPG: 137 genes. Average *TAF1*-dependency in High, Medium, Low, and RPG group are -1.73, -0.92, -0.08, and -1.82, respectively.

(B) Metagene anchor-plot shows averaged ChIP-exo occupancy near TSS regions (-200 bp to +400 bp) of *Taf1*, *Taf2*, *Taf4*, *Taf8*, *Bdf1* and TBP adapted and re-analyzed from other studies Reja et al., (2015) and Rhee and Pugh, (2012). Upper panel shows the recently reported cryo-EM structure of TFIID bound to promoter DNA (Louder et al., 2016).

(C) Boxplots showing ratios of downstream (+30 bp ~ +170 bp from TSS) versus upstream (-150 bp ~ -10 from TSS) *Taf1* occupancy in different *TAF1*-dependency groups as defined in **Fig 2**. *Taf1* occupancy was defined as total ChIP-exo tag counts within the designated region (Rhee and Pugh, 2012). (p-value: \*\*<0.05, \*\*\*<0.005)

# Figure S3

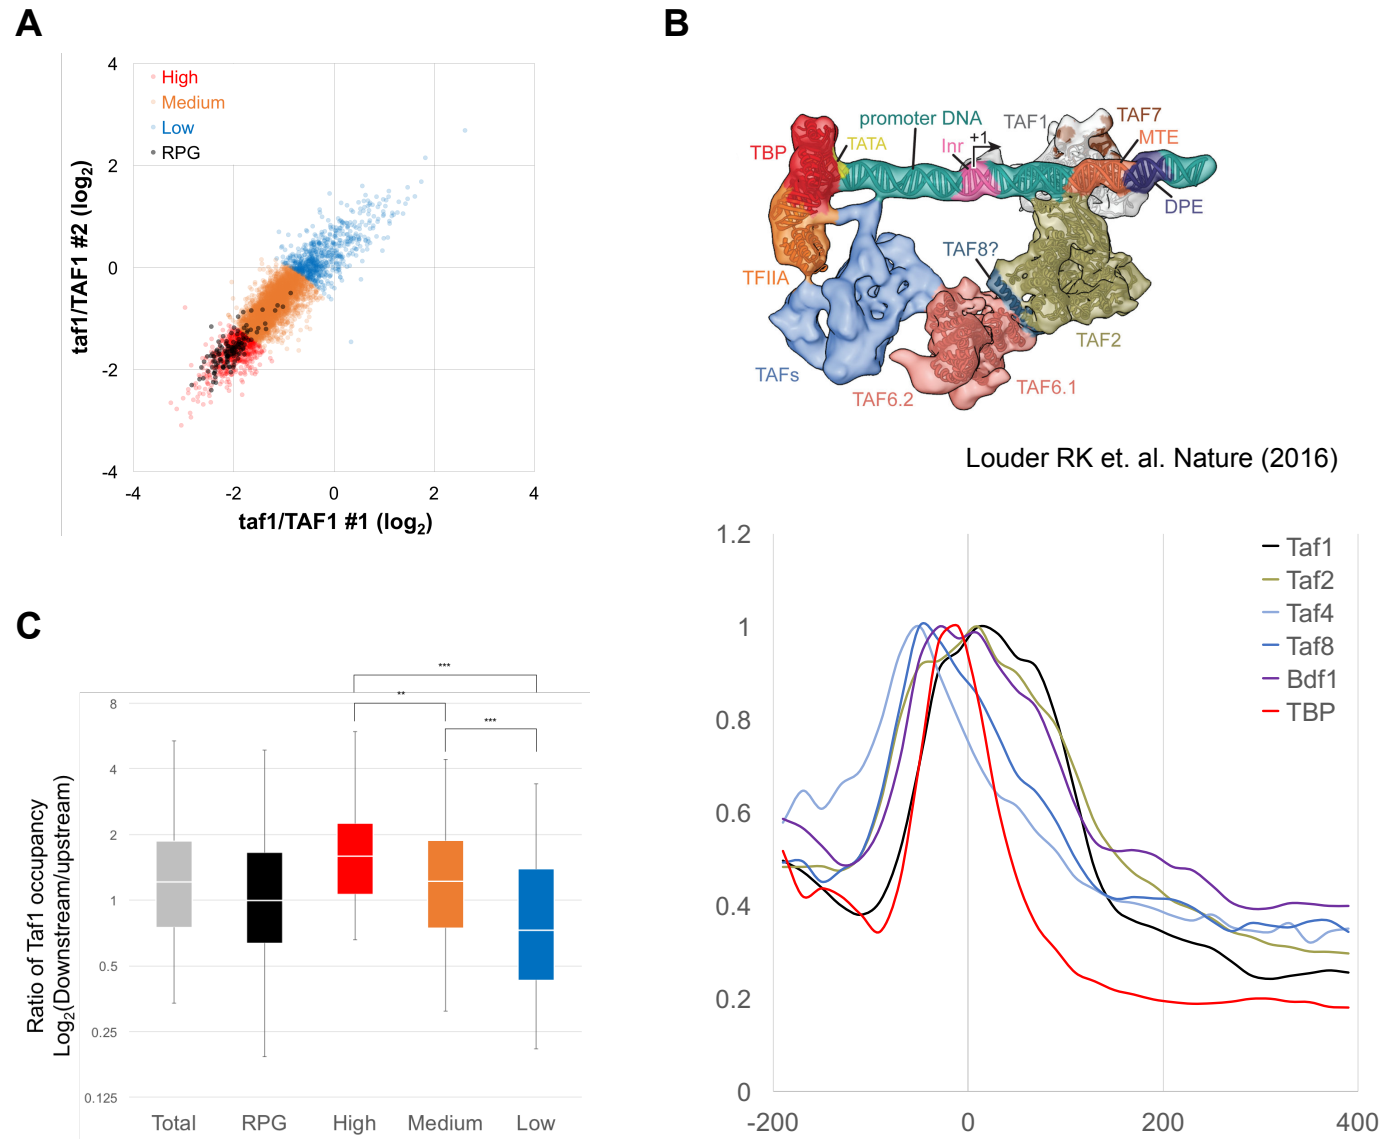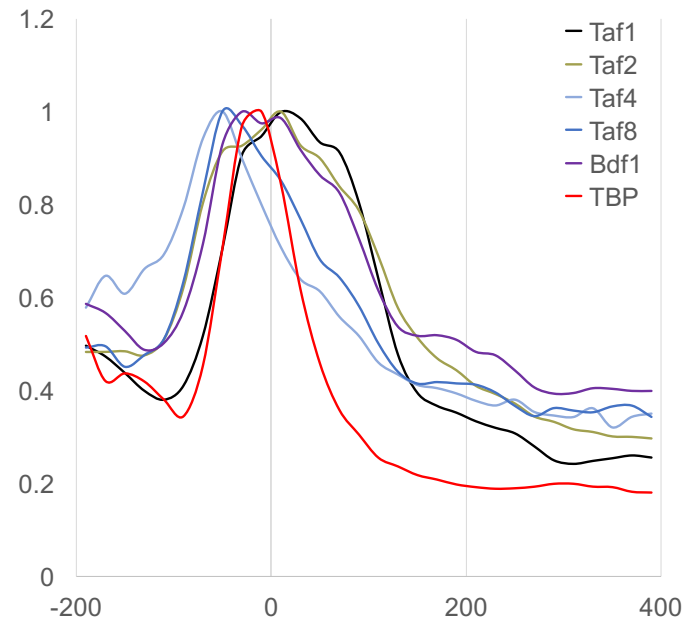

### Figure S4, related to Figure 3.

(A) Anchor-plot shows averaged ChIP-seq occupancy near TSS (-1 kb ~ +1 kb) of H3 and acetylated H4 (H4ac) for the four Taf1-dependence classes.

(B) Pairwise correlation plots of Taf1(upstream), Taf1(downstream), total Taf1, TBP, Bdf1, Htz1, Swr1, H3, and H4ac levels at individual promoters. Each dot represents a single promoter (total 4720 genes for ChIPexo and 6018 genes for ChIPseq datasets), with colors designating Taf1-dependence class as in **Fig 2**. Occupancies of Taf1(up/downstream), H3, and H4ac were determined as described in **Fig 3**. Occupancy levels of Taf1, TBP, Bdf1, Htz1, and Swr1 were determined as the maximum of ChIPseq reads within a fixed region (-200 bp to +400 bp relative to TSS). Each dot represents one mRNA gene (total 4720 genes with ChIPexo and 6018 genes with ChIPseq results). For each graph, Spearman's rank correlation coefficient ( $\rho$ ) is shown.

# Figure S4

**A**

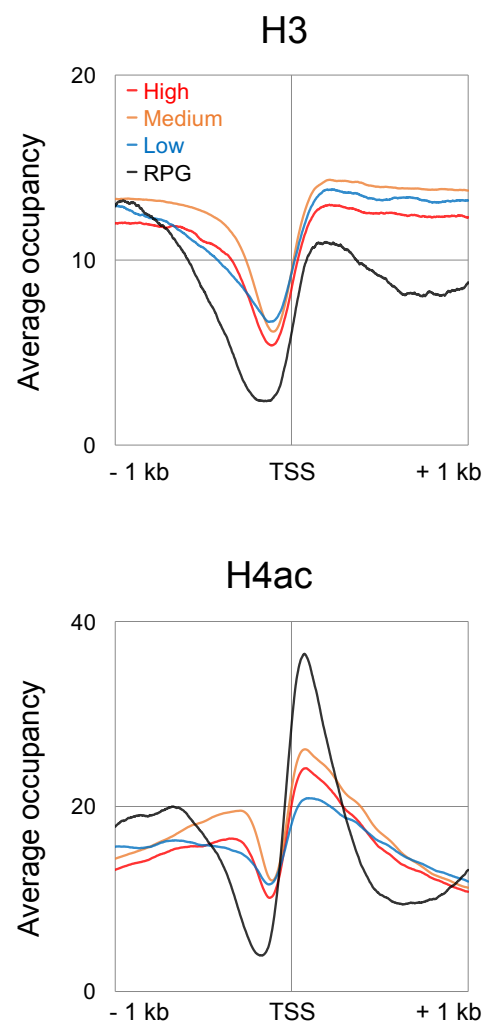

**B**

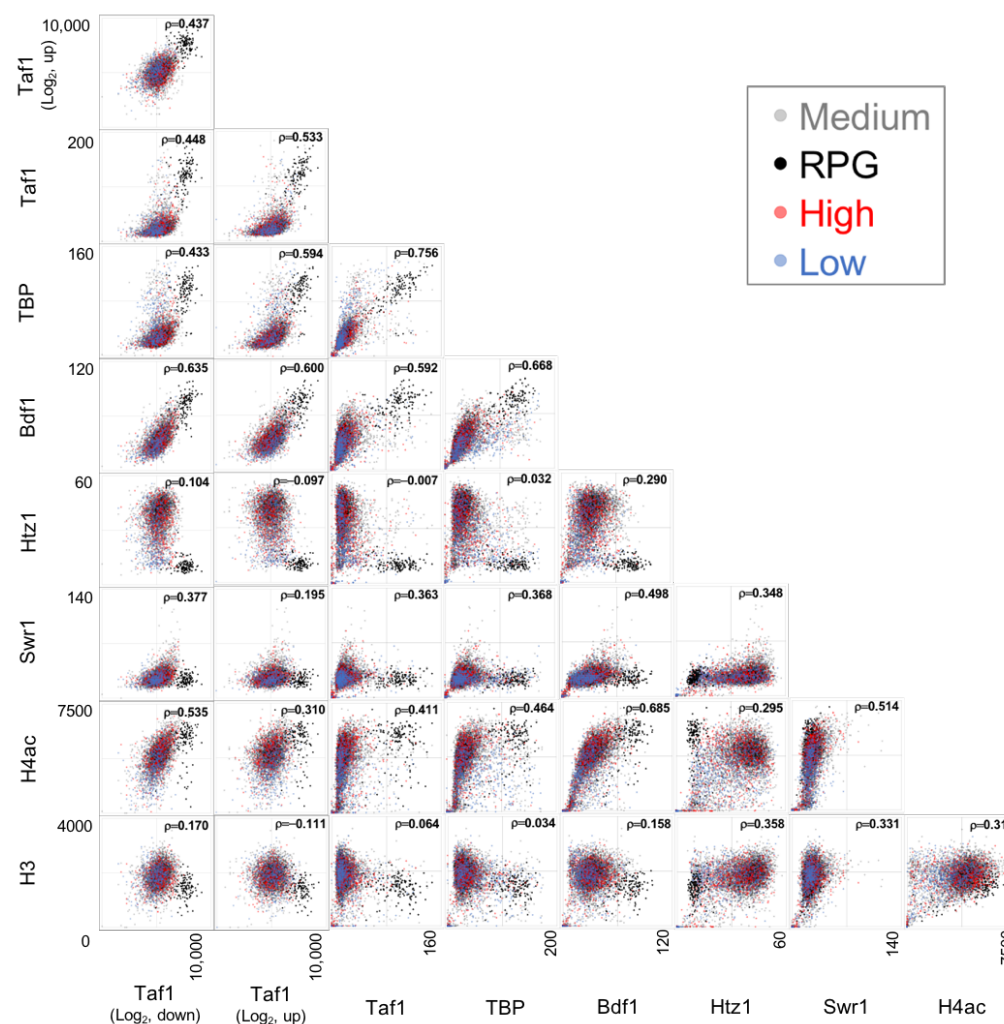

### **Figure S5, related to Figure 4.**

(A) Representative gel for in vitro transcription analysis performed as in **Fig 4** with TAF1 wild type and mutant nuclear extracts. The same amount of reaction mixture was taken at 3 min (Single-round) or 45 min (Multi-round) in the presence or absence of transcription activator Gal4-vp16 as indicated. The transcripts were precipitated and separated on 6% urea-acrylamide gel and detected by autoradiography.

(B) Immobilized HIS4p template used in **Figure S2A** was incubated with nuclear extract for 30 min. After three washes, a run-off reaction was done by adding all four NTPs with  $^{32}\text{P}$ -UTP for 5 min in 1X transcription buffer. The run-off transcripts were quantified by gel electrophoresis (left panel) and phosphorimager, normalized, and plotted (right panel).

# Figure S5

**A**

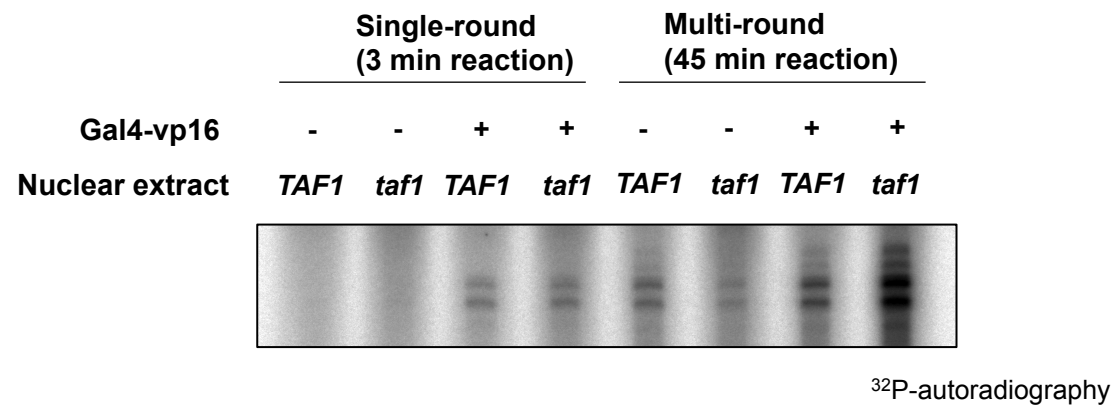

**B**

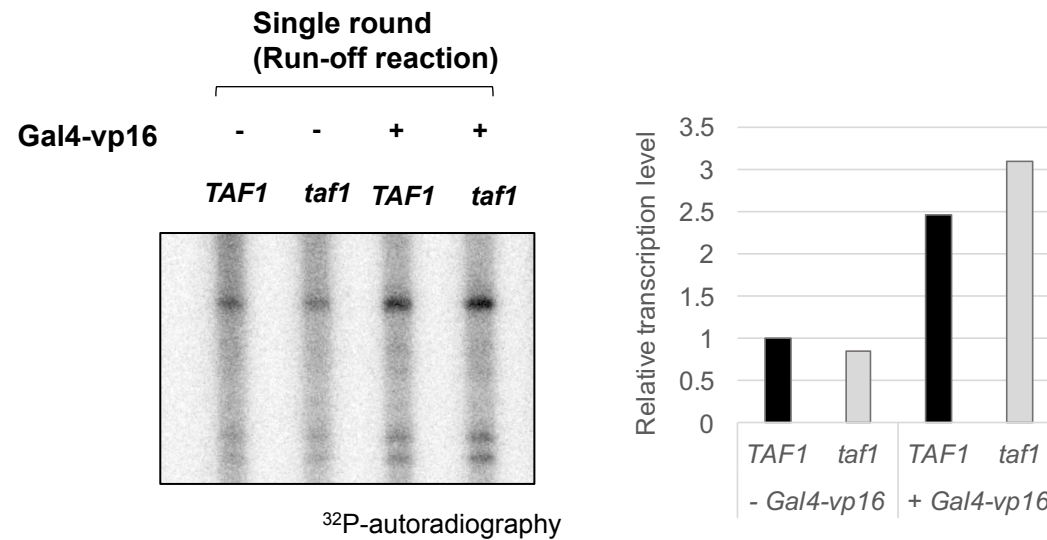

## Figure S6, related to Figure 5.

(A) Sequential transcription analysis was performed as in **Fig 5A**, except for the inclusion of Gal4-vp16 (200 ng) throughout the reaction. The same amount of reaction mixture was taken at four different time points (2, 4, 8, and 16 min) and transcripts were precipitated and separated on 6% urea-acrylamide gel. Relative levels of Transcript 1 over time are displayed below each lane after normalizing to Transcript 2 levels and setting the 16 minute maximum to 1.00.

(B) Sequential transcription analysis was performed with ATP in pre-incubation. The same amount of reaction mixture was taken at four different time points (2, 4, 8, and 16 min) and transcripts were analyzed the same as in panel (A).

(C) Sequential transcription assay was performed with wild-type (*TAF1*) and two taf mutants (*taf1* and *taf11*) nuclear extracts in the first pre-incubation reaction. After washes, the second transcription reaction was performed with wild type nuclear extract. Quantitation from three or more independent replicates of each extract is shown in **Fig 5D**.

Figure S6

A

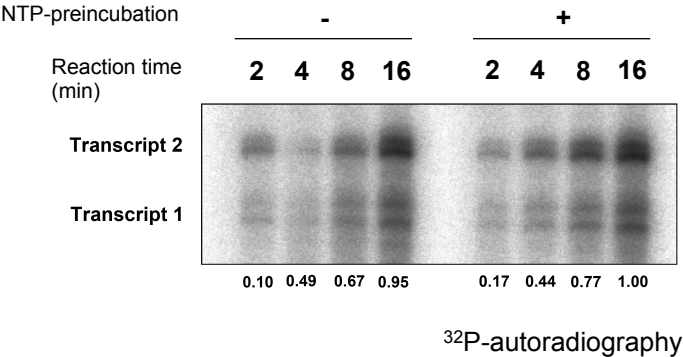

B

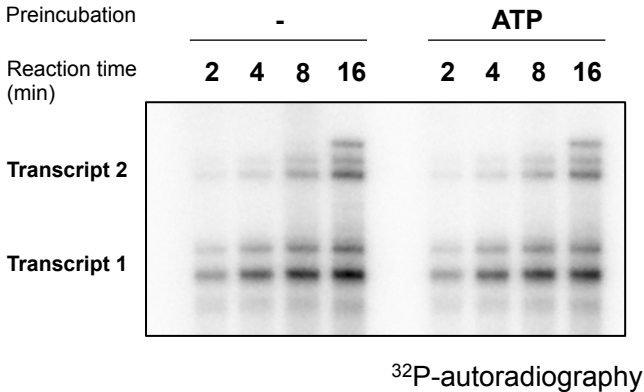

C

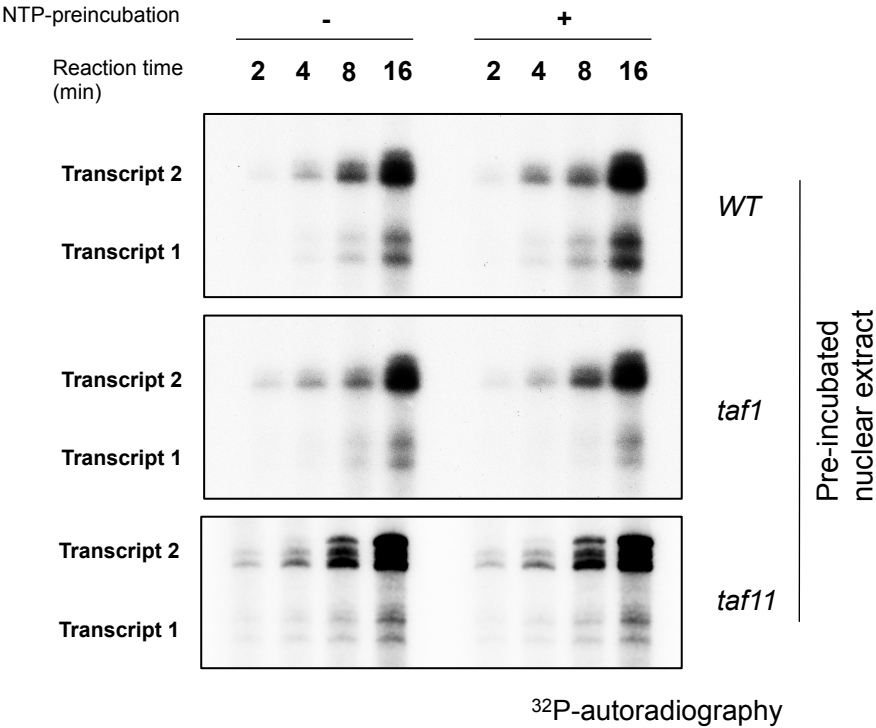

**Figure S7, related to Figure 6.**

(A) Metagene anchor-plots with ChIPseq analysis show average Taf1 and TBP binding near TSS (-200 bp to +400 bp) after RPB1-depletion for TAF-dependency groups defined in Fig 2.

(B) Same as in A, except Bdf1 was depleted.

Figure S7

A

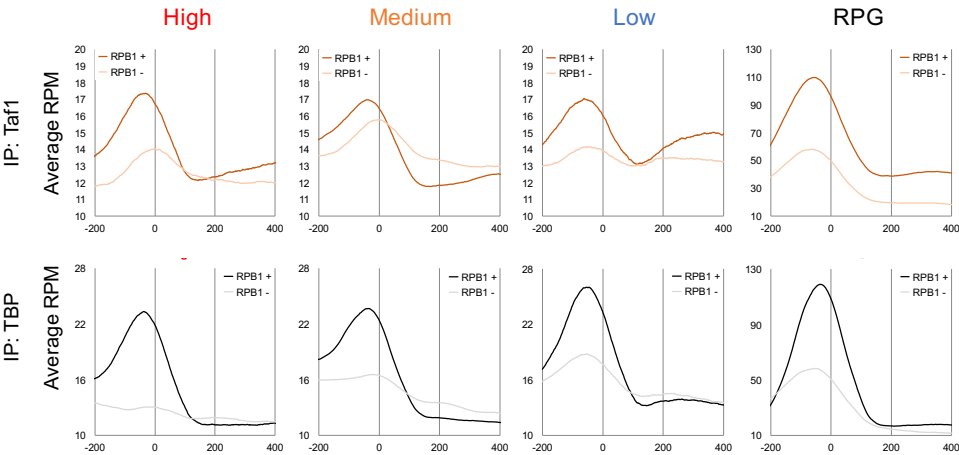

B

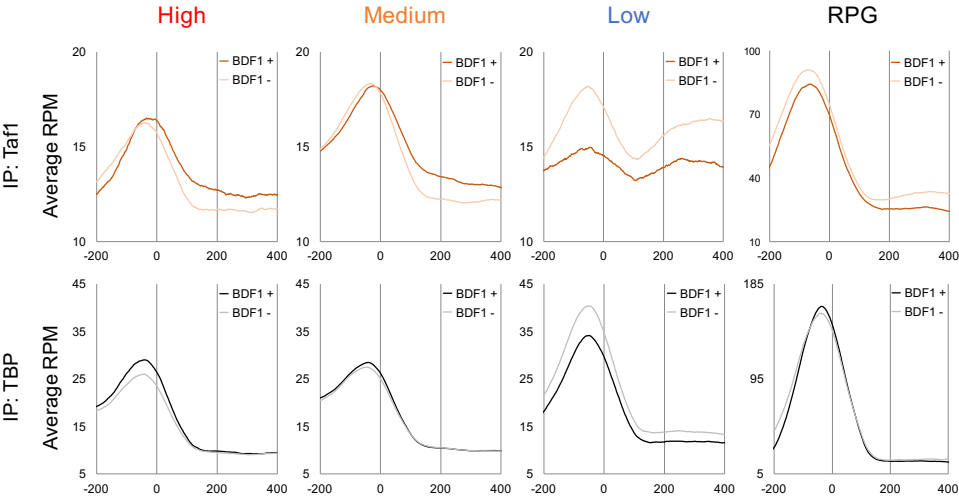

**Table S1. Enrichment values ( $\log_2$ ) from quantitative mass-spectrometry analysis of proteins showing transcription-dependent association with downstream promoter DNA.**

| Complex              | Protein | NTP enrichment<br>w/o $\alpha$ -amanitin | NTP enrichment<br>w/ $\alpha$ -amanitin | $\alpha$ -amanitin<br>sensitivity |
|----------------------|---------|------------------------------------------|-----------------------------------------|-----------------------------------|
| RNApII               | RPB1    | 0.588                                    | 0.082                                   | 0.506                             |
|                      | RPB2    | 0.565                                    | 0.122                                   | 0.443                             |
|                      | RPB3    | 0.611                                    | 0.130                                   | 0.481                             |
|                      | RPB4    | 0.616                                    | -0.039                                  | 0.654                             |
|                      | RPB6    | 0.613                                    | 0.197                                   | 0.415                             |
|                      | RPB7    | 0.711                                    | 0.066                                   | 0.646                             |
|                      | RPB9    | 0.695                                    | 0.094                                   | 0.601                             |
|                      | RPB10   | 0.631                                    | 0.097                                   | 0.534                             |
|                      | RPB12   | 0.538                                    | -0.158                                  | 0.696                             |
| TAFs                 | BDF1    | 0.552                                    | 0.179                                   | 0.373                             |
|                      | BDF2    | 0.568                                    | 0.180                                   | 0.388                             |
|                      | TAF1    | 0.688                                    | 0.095                                   | 0.593                             |
|                      | TAF2    | 0.707                                    | 0.106                                   | 0.602                             |
|                      | TAF3    | 0.397                                    | 0.061                                   | 0.336                             |
|                      | TAF4    | 0.356                                    | 0.063                                   | 0.293                             |
|                      | TAF5    | 0.466                                    | 0.013                                   | 0.452                             |
|                      | TAF6    | 0.532                                    | 0.032                                   | 0.500                             |
|                      | TAF7    | 0.761                                    | 0.015                                   | 0.746                             |
|                      | TAF9    | 0.610                                    | 0.011                                   | 0.598                             |
|                      | TAF8    | 0.585                                    | 0.150                                   | 0.435                             |
|                      | TAF11   | 0.527                                    | 0.018                                   | 0.509                             |
|                      | TAF12   | 0.541                                    | 0.074                                   | 0.468                             |
|                      | TAF13   | 0.655                                    | 0.044                                   | 0.612                             |
| PAF1                 | CTR9    | 1.213                                    | 0.166                                   | 1.046                             |
|                      | PAF1    | 0.973                                    | 0.130                                   | 0.843                             |
|                      | CDC73   | 0.803                                    | 0.052                                   | 0.751                             |
|                      | RTF1    | 0.650                                    | 0.088                                   | 0.562                             |
| Elongation<br>factor | SPT5    | 1.154                                    | 0.290                                   | 0.863                             |
|                      | SPT6    | 0.945                                    | 0.267                                   | 0.679                             |
|                      | SPN1    | 0.721                                    | 0.219                                   | 0.502                             |
| SWI/SNF              | SWI1    | 1.415                                    | 0.799                                   | 0.616                             |
|                      | SNF2    | 1.309                                    | 1.000                                   | 0.309                             |
|                      | SWI3    | 1.081                                    | 0.773                                   | 0.307                             |
|                      | SNF6    | 1.053                                    | 0.719                                   | 0.334                             |
| Others               | ABD1    | 0.355                                    | -0.048                                  | 0.403                             |
|                      | EAF3    | 0.439                                    | 0.072                                   | 0.367                             |
|                      | HEK2    | 0.764                                    | -0.069                                  | 0.833                             |
|                      | RAD26   | 0.668                                    | 0.303                                   | 0.365                             |
|                      | RPH1    | 0.364                                    | -0.031                                  | 0.395                             |
|                      | SET2    | 0.668                                    | 0.267                                   | 0.401                             |
|                      | SSD1    | 0.606                                    | -0.060                                  | 0.666                             |
|                      | SWC3    | 1.295                                    | 0.956                                   | 0.339                             |
|                      | YJR039W | 0.980                                    | 0.602                                   | 0.378                             |

All numbers are expressed as  $\log_2$  values.  $\alpha$ -amanitin sensitivity is the difference between the  $-\alpha$ -amanitin and  $+\alpha$ -amanitin enrichment values.

Yeast strains used in this study

| Name                  | Stock#  | Genotype                                                                                                                                  | Source                      |
|-----------------------|---------|-------------------------------------------------------------------------------------------------------------------------------------------|-----------------------------|
| BY4741                | YF336   | <i>MATa, ura3Δ0, leu2Δ0, his3Δ1, met15Δ0</i>                                                                                              | Winzeler et al. (1999) Scie |
| BJ2168                | YF4     | <i>MATa, ura3-52, leu2-, trp1-, prb1-1122, pep4-3, prc1-407, gal2-</i>                                                                    | E. Jones (1991) Methods I   |
| Rpb1-FRB              | YSB3202 | <i>MATa, ura3-, leu2-3,112, trp1-1, his3-11,15, fpr1::NAT, RPL13A-2xFKBP12::TRP1, tor1-1, ade2-1, can1-100, RPB1-FRB::HIS3MX</i>          | In this study               |
| Bdf1-FRB              | YSB3323 | <i>MATa, ura3-, leu2-3,112, trp1-1, his3-11,15, fpr1::NAT, RPL13A-2xFKBP12::TRP1, tor1-1, ade2-1, can1-100, BDF1-FRB::HIS3MX</i>          | In this study               |
| YSW87                 | YF157   | <i>MATa, ura3Δ99, leuΔ1, his3Δ200, lys2-801, ade2-101, taf1Δ::LEU2, [pSW104 = TAF1, HIS3, CEN/ARS]</i>                                    | Walker et al. (1996) Nature |
| YSW90 ( <i>taf1</i> ) | YF158   | <i>MATa, ura3Δ99, leuΔ1, his3Δ200, lys2-801, ade2-101, taf1Δ::LEU2, [pRS313-TAF145<sup>ts</sup> = taf1 ts allele ts-1, HIS3, CEN/ARS]</i> | Walker et al. (1996) Nature |
| <i>taf11</i>          | YSB1732 | <i>MATa, ura3-52, leu2, trp1Δ63, his3Δ200, taf11Δ::LEU2, [pRS314-FLAG-taf40-3100 = taf11-3100, TRP1, CEN/ARS]</i>                         | Komarnitsky, Michel, and f  |

## Oligonucleotides used in this study

| Purpose                 | Name                      | Strand  | Sequence (5' → 3')                               | stock(O#) |
|-------------------------|---------------------------|---------|--------------------------------------------------|-----------|
| G-less template (CYC1p) | Biotin - universal        | Forward | 5Biosg/TTGGGTAACGCCAGGGT                         | 3151      |
|                         | M13 -21 Reverse (FL)      | Reverse | GGAAACAGCTATGACCATG                              | 1477      |
|                         | G-LESS PRIMER (+128)      | Reverse | AGAGTGAATGATGATAGATTTGGGAAA                      | 301       |
|                         | mid G-less-runoff-R (+90) | Reverse | GAGAGAAGAGGAGAAGATAATA                           | 3157      |
|                         | Mid G-less-d3_rev (+16)   | Reverse | GGAGGTATAGAAGTATAGTAATTTATG                      | 3898      |
|                         | Mid G-less-d4_rev (-16)   | Reverse | AAAAATAATGTATAAGGAAAGAATATTTAGAG                 | 3899      |
|                         | Bio_CYC1pro_for (NΔ1)     | Forward | 5Biosg/TTCTTCTTTTCTCTAAATATTCTTTCC               | 3923      |
|                         | Bio_Gless_for (NΔ2)       | Forward | 5Biosg/ATTTTTTTTTTTTAAATATTATACCCTTCCTCCATCTATAC | 3922      |
| HIS4p template          | p965                      | Forward | 5Biosg/TAATGCAGCTGGCACGACAGG                     | 1105      |
|                         | pNot                      | Reverse | GGCCGCTCTAGCTGCATTAAATG                          | 1104      |
| HIS4 template           | HIS4 5' ORF rev           | Reverse | GGTACATTCAATTGTTCACCA                            | 3513      |
| PGK1 template           | PGK1 5' rev               | Reverse | GCAACAATTCTTTGGTTAGAAG                           | 3433      |
| RDN1-1 template         | Bio_pGEM_for              | Forward | 5Biosg/GATATAGGCGCCAGCAAC                        | 3278      |
|                         | Pol I pro_rev             | Reverse | AACGAACGACAAGCCTACT                              | 3279      |

Plasmids used in this study

| Plasmid name                 | Stock # | Features                                                                                                                                    |
|------------------------------|---------|---------------------------------------------------------------------------------------------------------------------------------------------|
| pUC18-G <sub>5</sub> CYC1 G- | SB649   | 5 copies of GAL4 binding sites upstream of <i>CYC1</i> promoter driving short G-less cassette (250, 277 nt transcript), Amp <sup>R</sup>    |
| pG5CG-D2                     | F916    | 5 copies of GAL4 binding sites upstream of <i>CYC1</i> promoter fused to a 377 bp G-less cassette with an introduced DraI site at bp 307, A |
| pUC18-G5 PGK1                | SB1718  | 5 copies of GAL4 binding site upstream of PGK1 promoter and ORF, Amp <sup>R</sup>                                                           |
| pSH515-HIS4                  | SB1722  | wild type HIS4 transcription unit (5' core promoter, ORF, and 3' UTR) with a single Gal4 binding site, Amp <sup>R</sup>                     |
| pSH515                       | F529    | wild type HIS4 core promoter region with a single Gal4 binding site, Amp <sup>R</sup>                                                       |
| pYrIIA                       | F82     | yeast rDNA promoter, Amp <sup>R</sup>                                                                                                       |

## References

- Huisinga, K.L., and Pugh, B.F. (2004). A genome-wide housekeeping role for TFIID and a highly regulated stress-related role for SAGA in *Saccharomyces cerevisiae*. *Mol Cell* 13, 573-585.
- A. Johnson, G. Li, T.W. Sikorski, S. Buratowski, C.L. Woodcock, and D. Moazed (2009). Reconstitution of heterochromatin-dependent transcriptional gene silencing. *Mol. Cell* 35, 769-781.
- Jones, E.W. (1991). Tackling the protease problem in *Saccharomyces cerevisiae*. *Methods Enzymol* 194, 428-53.
- Komarnitsky, P.B., Michel, B., and Buratowski, S. (1999). TFIID-specific yeast TAF40 is essential for the majority of RNA polymerase II-mediated transcription in vivo. *Genes Dev* 13, 2484-2489.
- Louder, R.K., He, Y., Lopez-Blanco, J.R., Fang, J., Chacon, P., and Nogales, E. (2016). Structure of promoter-bound TFIID and model of human pre-initiation complex assembly. *Nature* 531, 604-609.
- Pardee, T.S., Ghazy, M.A., and Ponticelli, A.S. (2003). Yeast and Human RNA polymerase II elongation complexes: evidence for functional differences and postinitiation recruitment of factors. *Eukaryotic Cell* 2, 318-327.
- Reja, R., Vinayachandran, V., Ghosh, S., and Pugh, B.F. (2015). Molecular mechanisms of ribosomal protein gene coregulation. *Genes Dev* 29, 1942-1954.
- Rhee, H.S., and Pugh, B.F. (2012). Genome-wide structure and organization of eukaryotic pre-initiation complexes. *Nature* 483, 295-301.
- Winzeler, E.A. et al. (1999). Functional characterization of the *S. cerevisiae* genome by gene deletion and parallel analysis. *Science* 285, 901-6.
